# Supplementary material for: Analyzing the Level of Detail of Construction Schedule for Enabling Site Logistics Planning (SLP) in the Building Information Modeling (BIM) Environment
Source: MDPI journal article supplement (doi:10.3390/su14116701), 2022-05-30
Supplement: s1 [file s1]

**Table S1.** WBS for construction phase and detailed schedule for the construction phase.

| WBS Level Name                                     | Duration    |
|----------------------------------------------------|-------------|
| <b>Production Hall</b>                             | <b>60 d</b> |
| <b>1. Site Preparation Works</b>                   | <b>8 d</b>  |
| 1.1. Material delivery                             | 8 d         |
| 1.1.1. Formwork delivery                           | 1 d         |
| 1.1.2. Reinforcement delivery                      | 3 d         |
| 1.1.3. Steel construction delivery                 | 1 d         |
| 1.1.4. Facade panels delivery                      | 1 d         |
| 1.1.5. Roof panels delivery                        | 2 d         |
| <b>2. Construction Works</b>                       | <b>58 d</b> |
| 2.1. Offices                                       | 38 d        |
| 2.1.1. Foundations                                 | 5 d         |
| 2.1.1.1. Slab foundations                          | 5 d         |
| 2.1.1.1.1. Formwork and reinforcement installation | 2 d         |
| 2.1.1.1.1. Concrete works                          | 1 d         |
| 2.1.1.1.1. Formwork dismantling                    | 1 d         |
| 2.1.2. Ground floor                                | 34 d        |
| 2.1.2.1. Steel columns                             | 4 d         |
| 2.1.2.1.1. Assembly                                | 4 d         |
| 2.1.2.2. Steel beams                               | 2 d         |
| 2.1.2.2.1. Assembly                                | 2 d         |
| 2.1.2.3. L-profile                                 | 1 d         |
| 2.1.2.3.1. Assembly                                | 1 d         |
| 2.1.2.4. Slab and stairs                           | 12 d        |
| 2.1.2.4.1. Formwork and reinforcement installation | 4 d         |
| 2.1.2.4.2. Concrete works                          | 1 d         |
| 2.1.2.4.3. Formwork dismantling                    | 2 d         |
| 2.1.2.5. Facade panels                             | 2 d         |
| 2.1.2.5.1. Assembly                                | 2 d         |
| 2.1.2.6. Partition walls                           | 8 d         |
| 2.1.2.6.1. Assembly                                | 8 d         |
| 2.1.3. First floor                                 | 3 d         |
| 2.1.3.1. Steel columns                             | 2 d         |
| 2.1.3.1.1. Assembly                                | 2 d         |
| 2.1.3.2. Steel beams                               | 1 d         |
| 2.1.3.2.1. Assembly                                | 1 d         |
| 2.1.4. Roof                                        | 7 d         |
| 2.1.4.1. Roof frame rafter                         | 1 d         |
| 2.1.4.1.1 assembly                                 | 1 d         |
| 2.1.4.2. Roof purlin                               | 2 d         |
| 2.1.4.2.1. Assembly                                | 2 d         |
| 2.1.4.3. Roof bracing                              | 1 d         |
| 2.1.4.3.1. Assembly                                | 1 d         |
| 2.1.4.4. Roof panels                               | 3 d         |
| 2.1.4.4.1. Assembly                                | 3 d         |
| 2.2. Production plant                              | 56 d        |
| 2.2.1. Foundations                                 | 13 d        |
| 2.2.1.1. Slab foundations                          | 13 d        |

|                                                    |             |
|----------------------------------------------------|-------------|
| 2.2.1.1.1. Formwork and reinforcement installation | 10 d        |
| 2.2.1.1.2. Concrete works                          | 2 d         |
| 2.2.1.1.3. Formwork dismantling                    | 2 d         |
| <b>2.2.2. Ground floor</b>                         | <b>40 d</b> |
| 2.2.2.1. Steel columns                             | 4 d         |
| 2.2.2.1.1. Assembly                                | 4 d         |
| 2.2.2.2. Steel beams                               | 3 d         |
| 2.2.2.2.1. Assembly                                | 3 d         |
| 2.2.2.3. L-profile                                 | 1 d         |
| 2.2.2.3.1. Assembly                                | 1 d         |
| 2.2.2.4. Facade panels                             | 3 d         |
| 2.2.2.4.1. Assembly                                | 3 d         |
| <b>2.2.3. Roof</b>                                 | <b>25 d</b> |
| 2.2.3.1. Roof frame rafter                         | 2 d         |
| 2.2.3.1.1. Assembly                                | 2 d         |
| 2.2.3.2. Roof purlin                               | 4 d         |
| 2.2.3.2.1. Assembly                                | 4 d         |
| 2.2.3.3. Roof bracing                              | 1 d         |
| 2.2.3.3.1. Assembly                                | 1 d         |
| 2.2.3.4. Roof panels                               | 3 d         |
| 2.2.3.4.1. Assembly                                | 3 d         |
| <b>2.3. Warehouse</b>                              | <b>13 d</b> |
| <b>2.3.1. Ground floor</b>                         | <b>13 d</b> |
| 2.3.1.1. Steel columns                             | 2 d         |
| 2.3.1.1.1. Assembly                                | 2 d         |
| 2.3.1.2. Steel beams                               | 2 d         |
| 2.3.1.2.1. Assembly                                | 2 d         |
| 2.3.1.3. L-profile                                 | 1 d         |
| 2.3.1.3.1. Assembly                                | 1 d         |
| 2.3.1.4. Facade panels                             | 2 d         |
| 2.3.1.4.1. Assembly                                | 2 d         |
| <b>2.3.2. Roof</b>                                 | <b>7 d</b>  |
| 2.3.2.1. Roof frame rafter                         | 1 d         |
| 2.3.2.1.1. Assembly                                | 1 d         |
| 2.3.2.2. Roof purlin                               | 2 d         |
| 2.3.2.2.1. Assembly                                | 2 d         |
| 2.3.2.3. Roof bracing                              | 2 d         |
| 2.3.2.3.1. Assembly                                | 2 d         |
| 2.3.2.4. Roof panels                               | 2 d         |
| 2.3.2.4.1. Assembly                                | 2 d         |
| <b>3. Site Demobilization Works</b>                | <b>1 d</b>  |
| <b>3.1. Material and equipment removal</b>         | <b>1 d</b>  |
| 3.1.1. Auto crane departure                        | 2 d         |
| 3.1.2. Formwork removal                            | 1 d         |

**Table S2.** Detailed schedule for site logistics planning in the BIM environment (mobilization phase).

| No | WBS Level Name                                     | Predecessors | Material                                                  | Machinery | Duration |
|----|----------------------------------------------------|--------------|-----------------------------------------------------------|-----------|----------|
| 1  | <b>Production Hall</b>                             |              |                                                           |           | 60 d     |
| 2  | <b>1. Site Preparation Works</b>                   |              |                                                           |           | 8 d      |
| 3  | 1.1. Material delivery                             |              |                                                           |           | 8 d      |
| 4  | 1.1.1. Formwork delivery                           |              |                                                           |           | 1 d      |
| 5  | 1.1.1.1. Truck arrival                             | -            | Material on the truck                                     | Truck     | 2 h      |
| 6  | 1.1.1.2. Forklift positioning for unloading        | SS5          |                                                           | Forklift  | 2 h      |
| 7  | 1.1.1.3. Truck stop (during unloading)             | FS6          | Material disappears from the truck                        | Truck     | 4 h      |
| 8  | 1.1.1.4. Forklift repositioning (during unloading) | SS7          | Material on the forklift<br>Material appears in the stock | Forklift  | 4 h      |
| 9  | 1.1.1.5. Truck departure                           | FS8          |                                                           | Truck     | 2 h      |
| 10 | 1.1.2. Reinforcement delivery                      |              |                                                           |           | 3 d      |
| 11 | 1.1.2.1. Truck arrival                             | FS9          | Material on the truck                                     | Truck     | 6 h      |
| 12 | 1.1.2.2. Forklift positioning for unloading        | SS11         |                                                           | Forklift  | 6 h      |
| 13 | 1.1.2.3. Truck stop (during unloading)             | FS12         | Material disappears from the truck                        | Truck     | 12 h     |
| 14 | 1.1.2.4. Forklift repositioning (during unloading) | SS13         | Material on the forklift<br>Material appears in the stock | Forklift  | 12 h     |
| 15 | 1.1.2.5. Truck departure                           | FS14         |                                                           | Truck     | 6 h      |
| 16 | 1.1.3. Steel construction delivery                 |              |                                                           |           | 1 d      |
| 17 | 1.1.3.1. Truck arrival                             | FS15         | Material on the truck                                     | Truck     | 2 h      |
| 18 | 1.1.3.2. Forklift positioning for unloading        | SS17         |                                                           | Forklift  | 2 h      |
| 19 | 1.1.3.3. Truck stop (during unloading)             | FS18         | Material disappears from the truck                        | Truck     | 4 h      |
| 20 | 1.1.3.4. Forklift repositioning (during unloading) | SS19         | Material on the forklift<br>Material appears in the stock | Forklift  | 4 h      |
| 21 | 1.1.3.5. Truck departure                           | FS20         |                                                           | Truck     | 2 h      |
| 22 | 1.1.4. Facade panels delivery                      |              |                                                           |           | 1 d      |
| 23 | 1.1.4.1. Truck arrival                             | FS21         | Material on the truck                                     | Truck     | 2 h      |
| 24 | 1.1.4.2. Forklift positioning for unloading        | SS23         |                                                           | Forklift  | 2 h      |
| 25 | 1.1.4.3. Truck stop (during unloading)             | FS24         | Material disappears from the truck                        | Truck     | 4 h      |
| 26 | 1.1.4.4. Forklift repositioning (during unloading) | SS25         | Material on the forklift<br>Material appears in the stock | Forklift  | 4 h      |
| 27 | 1.1.4.5. Truck departure                           | FS26         |                                                           | Truck     | 2 h      |
| 28 | 1.1.5. Roof panels delivery                        |              |                                                           |           | 2 d      |
| 29 | 1.1.5.1. Truck arrival                             | FS27         | Material on the truck                                     | Truck     | 4 h      |
| 30 | 1.1.5.2. Forklift positioning for unloading        | SS29         |                                                           | Forklift  | 4 h      |
| 31 | 1.1.5.3. Truck stop (during unloading)             | FS30         | Material disappears from the truck                        | Truck     | 8 h      |
| 32 | 1.1.5.4. Forklift repositioning (during unloading) | SS31         | Material on the forklift<br>Material appears in the stock | Forklift  | 8 h      |
| 33 | 1.1.5.5. Truck departure                           | FS32         |                                                           | Truck     | 4 h      |
| 34 | <b>2. Construction Works</b>                       |              |                                                           |           | 58 d     |
| 35 | 2.1. Offices                                       |              |                                                           |           | 38 d     |
| 36 | 2.1.1. Foundations                                 |              |                                                           |           | 5 d      |
| 37 | 2.1.1.1. Slab foundations                          |              |                                                           |           | 5 d      |

|    |                                                       |                     |                                                                                           |              |      |
|----|-------------------------------------------------------|---------------------|-------------------------------------------------------------------------------------------|--------------|------|
| 38 | 2.1.1.1.1. Formwork and reinforcement installation    |                     |                                                                                           |              | 2 d  |
| 39 | 2.1.1.1.1.1. Formwork installation                    | FS9                 | Material appears at the place of the future element<br>Material disappears from the stock |              | 8 h  |
| 40 | 2.1.1.1.1.2. Reinforcement installation               | SS11 + 1 d;<br>SS39 | Material appears at the place of the future element<br>Material disappears from the stock |              | 16 h |
| 41 | 2.1.1.1.1. Concrete works                             |                     |                                                                                           |              | 1 d  |
| 42 | 2.1.1.1.1.1. Truck mixer arrival                      | FS39; FS40          |                                                                                           | Truck mixer  | 2 h  |
| 43 | 2.1.1.1.1.2. Truck mixer stop (concrete works)        | FS42                | Material appears at the place of the future element                                       | Truck mixer  | 4 h  |
| 44 | 2.1.1.1.1.3. Truck mixer departure                    | FS43                |                                                                                           | Truck mixer  | 2 h  |
| 45 | 2.1.1.1.1. Formwork dismantling                       |                     |                                                                                           |              | 1 d  |
| 46 | 2.1.1.1.1.1. Formwork dismantling                     | FS44 + 1 d          | Material appears in the stock                                                             |              | 8 h  |
| 47 | 2.1.2. Ground floor                                   |                     |                                                                                           |              | 34 d |
| 48 | 2.1.2.1. Steel columns                                |                     |                                                                                           |              | 4 d  |
| 49 | 2.1.2.1.1. Assembly                                   |                     |                                                                                           |              | 4 d  |
| 50 | 2.1.2.1.1.1. Mobile crane arrival and positioning     | FS21; FS46          |                                                                                           | Mobile crane | 8 h  |
| 51 | 2.1.2.1.1.2. Forklift repositioning for assembly      | SS50                |                                                                                           | Forklift     | 8 h  |
| 52 | 2.1.2.1.1.3. Mobile crane stop (during assembly)      | FS51                | Material appears at the place of the future element                                       | Mobile crane | 24 h |
| 53 | 2.1.2.1.1.4. Forklift repositioning (during assembly) | SS52                | Material on the forklift<br>Material disappears from the stock                            | Forklift     | 24 h |
| 54 | 2.1.2.2. Steel beams                                  |                     |                                                                                           |              | 2 d  |
| 55 | 2.1.2.2.1. Assembly                                   |                     |                                                                                           |              | 2 d  |
| 56 | 2.1.2.2.1.1. Mobile crane stop (during assembly)      | FS53                | Material appears at the place of the future element                                       | Mobile crane | 16 h |
| 57 | 2.1.2.2.1.2. Forklift repositioning (during assembly) | SS56                | Material on the forklift<br>Material disappears from the stock                            | Forklift     | 16 h |
| 58 | 2.1.2.3. L-profile                                    |                     |                                                                                           |              | 1 d  |
| 59 | 2.1.2.3.1. Assembly                                   |                     |                                                                                           |              | 1 d  |
| 60 | 2.1.2.3.1.1. Element assembly                         | SS56                | Material appears at the place of the future element<br>Material disappears from the stock |              | 8 h  |
| 61 | 2.1.2.4. Slab and stairs                              |                     |                                                                                           |              | 12 d |
| 62 | 2.1.2.4.1. Formwork and reinforcement installation    |                     |                                                                                           |              | 4 d  |
| 63 | 2.1.2.4.1.1. Formwork installation                    | FS57                | Material appears at the place of the future element<br>Material disappears from the stock |              | 32 h |

|    |                                                                        |             |                                                                                           |                                    |      |
|----|------------------------------------------------------------------------|-------------|-------------------------------------------------------------------------------------------|------------------------------------|------|
| 64 | 2.1.2.4.1.2. Reinforcement installation                                | SS63        | Material appears at the place of the future element<br>Material disappears from the stock | Mobile crane                       | 32 h |
| 65 | 2.1.2.4.2. Concrete works                                              |             |                                                                                           |                                    | 1 d  |
| 66 | 2.1.2.4.2.1. Truck concrete pump arrival                               | FS63; FS64  |                                                                                           | Truck concrete pump                | 2 h  |
| 67 | 2.1.2.4.2.2. Truck mixer arrival                                       | SS66        |                                                                                           | Truck mixer                        | 2 h  |
| 68 | 2.1.2.4.2.3. Truck mixer and truck concrete pump stop (concrete works) | FS67        | Material appears at the place of the future element                                       | Truck mixer<br>Truck concrete pump | 4 h  |
| 69 | 2.1.2.4.2.4. Truck concrete pump departure                             | FS68        |                                                                                           | Truck concrete pump                | 2 h  |
| 70 | 2.1.2.4.2.5. Truck mixer departure                                     | SS69        |                                                                                           | Truck mixer                        | 2 h  |
| 71 | 2.1.2.4.3. Formwork dismantling                                        |             |                                                                                           |                                    | 2 d  |
| 72 | 2.1.2.4.3.1. Formwork dismantling                                      | FS70 + 7 d  | Material appears at the place of the future element<br>Material disappears from the stock |                                    | 16 h |
| 73 | 2.1.2.5. Facade panels                                                 |             |                                                                                           |                                    | 2 d  |
| 74 | 2.1.2.5.1. Assembly                                                    |             |                                                                                           |                                    | 2 d  |
| 75 | 2.1.2.5.1.1. Mobile crane stop (during assembly)—1 tact                | FS119       | Material appears at the place of the future element                                       | Mobile crane                       | 7 h  |
| 76 | 2.1.2.5.1.2. Forklift repositioning (during assembly)—1 tact           | SS75        | Material on the forklift<br>Material disappears from the stock                            | Forklift                           | 7 h  |
| 77 | 2.1.2.5.1.3. Mobile crane positioning—tact 2                           | FS76        |                                                                                           | Mobile crane                       | 2 h  |
| 78 | 2.1.2.5.1.4. Forklift repositioning for assembly—tact 2                | SS77        |                                                                                           | Forklift                           | 2 h  |
| 79 | 2.1.2.5.1.5. Mobile crane stop (during assembly)—tact 2                | FS78        | Material appears at the place of the future element                                       | Mobile crane                       | 7 h  |
| 80 | 2.1.2.5.1.6. Forklift repositioning (during assembly)—tact 2           | SS79        | Material on the forklift<br>Material disappears from the stock                            | Forklift                           | 7 h  |
| 81 | 2.1.2.6. Partition walls                                               |             |                                                                                           |                                    | 8 d  |
| 82 | 2.1.2.6.1. Assembly                                                    |             |                                                                                           |                                    | 8 d  |
| 83 | 2.1.2.6.1.1. Truck arrival                                             | FS72; FS80  | Material on the truck                                                                     | Truck                              | 2 h  |
| 84 | 2.1.2.6.1.2. Truck stop (during unloading)                             | FS83        | Material disappears from the truck<br>Material appears in the stock                       | Truck                              | 4 h  |
| 85 | 2.1.2.6.1.3. Truck departure                                           | FS84        |                                                                                           | Truck                              | 2 h  |
| 86 | 2.1.2.6.1.4. Element assembly                                          | FS85        | Material appears at the place of the future element                                       |                                    | 56 h |
| 87 | 2.1.3. First floor                                                     |             |                                                                                           |                                    | 3 d  |
| 88 | 2.1.3.1. Steel columns                                                 |             |                                                                                           |                                    | 2 d  |
| 89 | 2.1.3.1.1. Assembly                                                    |             |                                                                                           |                                    | 2 d  |
| 90 | 2.1.3.1.1.1. Mobile crane positioning                                  | FS70; FS146 |                                                                                           | Mobile crane                       | 2 h  |
| 91 | 2.1.3.1.1.2. Forklift repositioning for assembly                       | SS90        |                                                                                           | Forklift                           | 2 h  |

|     |                                                              |       |                                                                                           |              |      |
|-----|--------------------------------------------------------------|-------|-------------------------------------------------------------------------------------------|--------------|------|
| 92  | 2.1.3.1.1.3. Mobile crane stop (during assembly)             | FS91  | Material appears at the place of the future element                                       | Mobile crane | 14 h |
| 93  | 2.1.3.1.1.4. Forklift repositioning (during assembly)        | SS92  | Material on the forklift<br>Material disappears from the stock                            | Forklift     | 14 h |
| 94  | 2.1.3.2. Steel beams                                         |       |                                                                                           |              | 1 d  |
| 95  | 2.1.3.2.1. Assembly                                          |       |                                                                                           |              | 1 d  |
| 96  | 2.1.3.2.1.1. Mobile crane stop (during assembly)             | FS93  | Material appears at the place of the future element                                       | Mobile crane | 8 h  |
| 97  | 2.1.3.2.1.2. Forklift repositioning (during assembly)        | SS96  | Material on the forklift<br>Material disappears from the stock                            | Forklift     | 8 h  |
| 98  | 2.1.4. Roof                                                  |       |                                                                                           |              | 7 d  |
| 99  | 2.1.4.1. Roof frame rafter                                   |       |                                                                                           |              | 1 d  |
| 100 | 2.1.4.1.1. Assembly                                          |       |                                                                                           |              | 1 d  |
| 101 | 2.1.4.1.1.1. Mobile crane stop (during assembly)             | FS97  | Material appears at the place of the future element                                       | Mobile crane | 8 h  |
| 102 | 2.1.4.1.1.2. Forklift repositioning (during assembly)        | SS101 | Material on the forklift<br>Material disappears from the stock                            | Forklift     | 8 h  |
| 103 | 2.1.4.2. Roof purlin                                         |       |                                                                                           |              | 2 d  |
| 104 | 2.1.4.2.1. Assembly                                          |       |                                                                                           |              | 2 d  |
| 105 | 2.1.4.2.1.1. Mobile crane stop (during assembly)             | FS102 | Material appears at the place of the future element                                       | Mobile crane | 8 h  |
| 106 | 2.1.4.2.1.2. Forklift repositioning (during assembly)        | SS105 | Material on the forklift<br>Material disappears from the stock                            | Forklift     | 8 h  |
| 107 | 2.1.4.3. Roof bracing                                        |       |                                                                                           |              | 1 d  |
| 108 | 2.1.4.3.1. Assembly                                          |       |                                                                                           |              | 1 d  |
| 109 | 2.1.4.3.1.1. Element assembly                                | FS106 | Material appears at the place of the future element<br>Material disappears from the stock |              | 8 h  |
| 110 | 2.1.4.4. Roof panels                                         |       |                                                                                           |              | 3 d  |
| 111 | 2.1.4.4.1. Assembly                                          |       |                                                                                           |              | 3 d  |
| 112 | 2.1.4.4.1.1. Mobile crane positioning—tact 1                 | FS109 |                                                                                           | Mobile crane | 2 h  |
| 113 | 2.1.4.4.1.2. Forklift repositioning for assembly—tact 1      | SS112 |                                                                                           | Forklift     | 2 h  |
| 114 | 2.1.4.4.1.3. Mobile crane stop (during assembly)—tact 1      | FS113 | Material appears at the place of the future element                                       | Mobile crane | 10 h |
| 115 | 2.1.4.4.1.4. Forklift repositioning (during assembly)—tact 1 | SS114 | Material on the forklift<br>Material disappears from the stock                            | Forklift     | 10 h |
| 116 | 2.1.4.4.1.5. Mobile crane positioning—tact 2                 | FS115 |                                                                                           | Mobile crane | 2 h  |
| 117 | 2.1.4.4.1.6. Forklift repositioning for assembly—tact 2      | SS116 |                                                                                           | Forklift     | 2 h  |

|     |                                                              |                   |                                                                                           |              |      |
|-----|--------------------------------------------------------------|-------------------|-------------------------------------------------------------------------------------------|--------------|------|
| 118 | 2.1.4.4.1.7. Mobile crane stop (during assembly)—tact 2      | FS117             | Material appears at the place of the future element                                       | Mobile crane | 10 h |
| 119 | 2.1.4.4.1.8. Forklift repositioning (during assembly)—tact 2 | SS118             | Material on the forklift<br>Material disappears from the stock                            | Forklift     | 10 h |
| 120 | 2.2. Production plant                                        |                   |                                                                                           |              | 56 d |
| 121 | 2.2.1. Foundations                                           |                   |                                                                                           |              | 13 d |
| 122 | 2.2.1.1. Slab foundations                                    |                   |                                                                                           |              | 13 d |
| 123 | 2.2.1.1.1. Formwork and reinforcement installation           |                   |                                                                                           |              | 10 d |
| 124 | 2.2.1.1.1.1. Formwork installation                           | FS63              | Material appears at the place of the future element<br>Material disappears from the stock |              | 8 h  |
| 125 | 2.2.1.1.1.2. Reinforcement installation                      | FS64; SS124 + 1 d | Material appears at the place of the future element<br>Material disappears from the stock |              | 72 h |
| 126 | 2.2.1.1.2. Concrete works                                    |                   |                                                                                           |              | 2 d  |
| 127 | 2.2.1.1.2.1. Truck mixer arrival                             | FS124; FS125      |                                                                                           | Truck mixer  | 2 h  |
| 128 | 2.2.1.1.2.2. Truck mixer stop (concrete works)               | FS127             | Material appears at the place of the future element                                       | Truck mixer  | 12 h |
| 129 | 2.2.1.1.2.3. Truck mixer departure                           | FS128             |                                                                                           | Truck mixer  | 2 h  |
| 130 | 2.2.1.1.3. Formwork dismantling                              |                   |                                                                                           |              | 2 d  |
| 131 | 2.2.1.1.3.1. Formwork dismantling                            | FS129 + 1 d       | Material appears in the stock                                                             |              | 16 h |
| 132 | 2.2.2. Ground floor                                          |                   |                                                                                           |              | 40 d |
| 133 | 2.2.2.1. Steel columns                                       |                   |                                                                                           |              | 4 d  |
| 134 | 2.2.2.1.1. Assembly                                          |                   |                                                                                           |              | 4 d  |
| 135 | 2.2.2.1.1.1. Mobile crane positioning—tact 1                 | FS64; FS131       |                                                                                           | Mobile crane | 2 h  |
| 136 | 2.2.2.1.1.2. Forklift repositioning for assembly—tact 1      | SS135             |                                                                                           | Forklift     | 2 h  |
| 137 | 2.2.2.1.1.3. Mobile crane stop (during assembly)—tact 1      | FS136             | Material appears at the place of the future element                                       |              | 9 h  |
| 138 | 2.2.2.1.1.4. Forklift repositioning (during assembly)—tact 1 | SS137             | Material on the forklift<br>Material disappears from the stock                            |              | 9 h  |
| 139 | 2.2.2.1.1.5. Mobile crane positioning—tact 2                 | FS138             |                                                                                           | Mobile crane | 2 h  |
| 140 | 2.2.2.1.1.6. Forklift repositioning for assembly—tact 2      | SS139             |                                                                                           | Forklift     | 2 h  |
| 141 | 2.2.2.1.1.7. Mobile crane stop (during assembly)—tact 2      | FS140             | Material appears at the place of the future element                                       |              | 8 h  |

|     |                                                               |             |                                                                                           |     |
|-----|---------------------------------------------------------------|-------------|-------------------------------------------------------------------------------------------|-----|
| 142 | 2.2.2.1.1.8. Forklift repositioning (during assembly)—tact 2  | SS141       | Material on the forklift<br>Material disappears from the stock                            | 8 h |
| 143 | 2.2.2.1.1.9. Mobile crane positioning—tact 3                  | FS142       | Mobile crane                                                                              | 2 h |
| 144 | 2.2.2.1.1.10. Forklift repositioning for assembly—tact 3      | SS143       | Forklift                                                                                  | 2 h |
| 145 | 2.2.2.1.1.11. Mobile crane stop (during assembly)—tact 3      | FS144       | Material appears at the place of the future element                                       | 9 h |
| 146 | 2.2.2.1.1.12. Forklift repositioning (during assembly)—tact 3 | SS145       | Material on the forklift<br>Material disappears from the stock                            | 9 h |
| 147 | 2.2.2.2. Steel beams                                          |             |                                                                                           | 3 d |
| 148 | 2.2.2.2.1. Assembly                                           |             |                                                                                           | 3 d |
| 149 | 2.2.2.2.1.1. Mobile crane positioning—tact 1                  | FS80; FS146 | Mobile crane                                                                              | 2 h |
| 150 | 2.2.2.2.1.2. Forklift repositioning for assembly—tact 1       | SS149       | Forklift                                                                                  | 2 h |
| 151 | 2.2.2.2.1.3. Mobile crane stop (during assembly)—tact 1       | FS150       | Material appears at the place of the future element                                       | 6 h |
| 152 | 2.2.2.2.1.4. Forklift repositioning (during assembly)—tact 1  | SS151       | Material on the forklift<br>Material disappears from the stock                            | 6 h |
| 153 | 2.2.2.2.1.5. Mobile crane positioning—tact 2                  | FS152       | Mobile crane                                                                              | 2 h |
| 154 | 2.2.2.2.1.6. Forklift repositioning for assembly—tact 2       | SS153       | Forklift                                                                                  | 2 h |
| 155 | 2.2.2.2.1.7. Mobile crane stop (during assembly)—tact 2       | FS154       | Material appears at the place of the future element                                       | 6 h |
| 156 | 2.2.2.2.1.8. Forklift repositioning (during assembly)—tact 2  | SS155       | Material on the forklift<br>Material disappears from the stock                            | 6 h |
| 157 | 2.2.2.2.1.9. Mobile crane positioning—tact 3                  | FS156       | Mobile crane                                                                              | 2 h |
| 158 | 2.2.2.2.1.10. Forklift repositioning for assembly—tact 3      | SS157       | Forklift                                                                                  | 2 h |
| 159 | 2.2.2.2.1.11. Mobile crane stop (during assembly)—tact 3      | FS158       | Material appears at the place of the future element                                       | 6 h |
| 160 | 2.2.2.2.1.12. Forklift repositioning (during assembly)—tact 3 | SS159       | Material on the forklift<br>Material disappears from the stock                            | 6 h |
| 161 | 2.2.2.3. L-profile                                            |             |                                                                                           | 1 d |
| 162 | 2.2.2.3.1. Assembly                                           |             |                                                                                           | 1 d |
| 163 | 2.2.2.3.1.1. Element assembly                                 | SS146       | Material appears at the place of the future element<br>Material disappears from the stock | 8 h |
| 164 | 2.2.2.4. Facade panels                                        |             |                                                                                           | 3 d |



|     |                                                               |       |                                                                |      |
|-----|---------------------------------------------------------------|-------|----------------------------------------------------------------|------|
| 165 | 2.2.2.4.1. Assembly                                           |       |                                                                | 3 d  |
| 166 | 2.2.2.4.1.1. Mobile crane positioning—tact 1                  | FS254 | Mobile crane                                                   | 2 h  |
| 167 | 2.2.2.4.1.2. Forklift repositioning for assembly—tact 1       | SS166 | Forklift                                                       | 2 h  |
| 168 | 2.2.2.4.1.3. Mobile crane stop (during assembly)—tact 1       | FS167 | Material appears at the place of the future element            | 4 h  |
| 169 | 2.2.2.4.1.4. Forklift repositioning (during assembly)—tact 1  | SS168 | Material on the forklift<br>Material disappears from the stock | 4 h  |
| 170 | 2.2.2.4.1.5. Mobile crane positioning—tact 2                  | FS169 | Mobile crane                                                   | 2 h  |
| 171 | 2.2.2.4.1.6. Forklift repositioning for assembly—tact 2       | SS170 | Forklift                                                       | 2 h  |
| 172 | 2.2.2.4.1.7. Mobile crane stop (during assembly)—tact 2       | FS171 | Material appears at the place of the future element            | 4 h  |
| 173 | 2.2.2.4.1.8. Forklift repositioning (during assembly)—tact 2  | SS172 | Material on the forklift<br>Material disappears from the stock | 4 h  |
| 174 | 2.2.2.4.1.9. Mobile crane positioning—tact 3                  | FS173 | Mobile crane                                                   | 2 h  |
| 175 | 2.2.2.4.1.10. Forklift repositioning for assembly—tact 3      | SS174 | Forklift                                                       | 2 h  |
| 176 | 2.2.2.4.1.11. Mobile crane stop (during assembly)—tact 3      | FS175 | Material appears at the place of the future element            | 4 h  |
| 177 | 2.2.2.4.1.12. Forklift repositioning (during assembly)—tact 3 | SS176 | Material on the forklift<br>Material disappears from the stock | 4 h  |
| 178 | 2.2.2.4.1.13. Mobile crane positioning—tact 4                 | FS177 | Mobile crane                                                   | 2 h  |
| 179 | 2.2.2.4.1.14. Forklift repositioning for assembly—tact 4      | SS178 | Forklift                                                       | 2 h  |
| 180 | 2.2.2.4.1.15. Mobile crane stop (during assembly)—tact 4      | FS179 | Material appears at the place of the future element            | 4 h  |
| 181 | 2.2.2.4.1.16. Forklift repositioning (during assembly)—tact 4 | SS180 | Material on the forklift<br>Material disappears from the stock | 4 h  |
| 182 | 2.2.3. Roof                                                   |       |                                                                | 25 d |
| 183 | 2.2.3.1. Roof frame rafter                                    |       |                                                                | 2 d  |
| 184 | 2.2.3.1.1. Assembly                                           |       |                                                                | 2 d  |
| 185 | 2.2.3.1.1.1. Mobile crane positioning—tact 1                  | FS160 | Mobile crane                                                   | 2 h  |
| 186 | 2.2.3.1.1.2. Forklift repositioning for assembly—tact 1       | SS185 | Forklift                                                       | 2 h  |
| 187 | 2.2.3.1.1.3. Mobile crane stop (during assembly)—tact 1       | FS186 | Material appears at the place of the future element            | 6 h  |

|     |                                                               |       |                                                                |     |
|-----|---------------------------------------------------------------|-------|----------------------------------------------------------------|-----|
| 188 | 2.2.3.1.1.4. Forklift repositioning (during assembly)—tact 1  | SS187 | Material on the forklift<br>Material disappears from the stock | 6 h |
| 189 | 2.2.3.1.1.5. Mobile crane positioning—tact 2                  | FS188 | Mobile crane                                                   | 2 h |
| 190 | 2.2.3.1.1.6. Forklift repositioning for assembly—tact 2       | SS189 | Forklift                                                       | 2 h |
| 191 | 2.2.3.1.1.7. Mobile crane stop (during assembly)—tact 2       | FS190 | Material appears at the place of the future element            | 6 h |
| 192 | 2.2.3.1.1.8. Forklift repositioning (during assembly)—tact 2  | SS191 | Material on the forklift<br>Material disappears from the stock | 6 h |
| 193 | 2.2.3.2. Roof purlin                                          |       |                                                                | 4 d |
| 194 | 2.2.3.2.1. Assembly                                           |       |                                                                | 4 d |
| 195 | 2.2.3.2.1.1. Mobile crane positioning—tact 1                  | FS192 | Mobile crane                                                   | 2 h |
| 196 | 2.2.3.2.1.2. Forklift repositioning for assembly—tact 1       | SS195 | Forklift                                                       | 2 h |
| 197 | 2.2.3.2.1.3. Mobile crane stop (during assembly)—tact 1       | FS196 | Material appears at the place of the future element            | 6 h |
| 198 | 2.2.3.2.1.4. Forklift repositioning (during assembly)—tact 1  | SS197 | Material on the forklift<br>Material disappears from the stock | 6 h |
| 199 | 2.2.3.2.1.5. Mobile crane positioning—tact 2                  | FS198 | Mobile crane                                                   | 2 h |
| 200 | 2.2.3.2.1.6. Forklift repositioning for assembly—tact 2       | SS199 | Forklift                                                       | 2 h |
| 201 | 2.2.3.2.1.7. Mobile crane stop (during assembly)—tact 2       | FS200 | Material appears at the place of the future element            | 6 h |
| 202 | 2.2.3.2.1.8. Forklift repositioning (during assembly)—tact 2  | SS201 | Material on the forklift<br>Material disappears from the stock | 6 h |
| 203 | 2.2.3.2.1.9. Mobile crane positioning—tact 3                  | FS202 | Mobile crane                                                   | 2 h |
| 204 | 2.2.3.2.1.10. Forklift repositioning for assembly—tact 3      | SS203 | Forklift                                                       | 2 h |
| 205 | 2.2.3.2.1.11. Mobile crane stop (during assembly)—tact 3      | FS204 | Material appears at the place of the future element            | 6 h |
| 206 | 2.2.3.2.1.12. Forklift repositioning (during assembly)—tact 3 | SS205 | Material on the forklift<br>Material disappears from the stock | 6 h |
| 207 | 2.2.3.2.1.13. Mobile crane positioning—tact 4                 | FS206 | Mobile crane                                                   | 2 h |
| 208 | 2.2.3.2.1.14. Forklift repositioning for assembly—tact 4      | SS207 | Forklift                                                       | 2 h |
| 209 | 2.2.3.2.1.15. Mobile crane stop (during assembly)—tact 4      | FS208 | Material appears at the place of the future element            | 6 h |
| 210 | 2.2.3.2.1.16. Forklift repositioning (during assembly)—tact 4 | SS209 | Material on the forklift<br>Material disappears from the stock | 6 h |

|     |                                                               |              |                                                                                           |                  |
|-----|---------------------------------------------------------------|--------------|-------------------------------------------------------------------------------------------|------------------|
| 211 | 2.2.3.3. Roof bracing                                         |              |                                                                                           | 1 d              |
| 212 | 2.2.3.3.1. Assembly                                           |              |                                                                                           | 1 d              |
| 213 | 2.2.3.3.1.1. Element assembly                                 | FS210        | Material appears at the place of the future element<br>Material disappears from the stock | 8 h              |
| 214 | 2.2.3.4. Roof panels                                          |              |                                                                                           | 3 d              |
| 215 | 2.2.3.4.1. Assembly                                           |              |                                                                                           | 3 d              |
| 216 | 2.2.3.4.1.1. Mobile crane stop (during assembly)—tact 1       | FS181        | Material appears at the place of the future element                                       | 4.5 h            |
| 217 | 2.2.3.4.1.2. Forklift repositioning (during assembly)—tact 1  | SS216        | Material on the forklift<br>Material disappears from the stock                            | 4.5 h            |
| 218 | 2.2.3.4.1.3. Mobile crane positioning—tact 2                  | FS217        |                                                                                           | Mobile crane 2 h |
| 219 | 2.2.3.4.1.4. Forklift repositioning for assembly—tact 2       | SS218        |                                                                                           | Forklift 2 h     |
| 220 | 2.2.3.4.1.5. Mobile crane stop (during assembly)—tact 2       | FS219        | Material appears at the place of the future element                                       | 4.5 h            |
| 221 | 2.2.3.4.1.6. Forklift repositioning (during assembly)—tact 2  | SS220        | Material on the forklift<br>Material disappears from the stock                            | 4.5 h            |
| 222 | 2.2.3.4.1.7. Mobile crane positioning—tact 3                  | FS221        |                                                                                           | Mobile crane 2 h |
| 223 | 2.2.3.4.1.8. Forklift repositioning for assembly—tact 3       | SS222        |                                                                                           | Forklift 2 h     |
| 224 | 2.2.3.4.1.9. Mobile crane stop (during assembly)—tact 3       | FS223        | Material appears at the place of the future element                                       | 4.5 h            |
| 225 | 2.2.3.4.1.10. Forklift repositioning (during assembly)—tact 3 | SS224        | Material on the forklift<br>Material disappears from the stock                            | 4.5 h            |
| 226 | 2.2.3.4.1.11. Mobile crane positioning—tact 4                 | FS225        |                                                                                           | Mobile crane 2 h |
| 227 | 2.2.3.4.1.12. Forklift repositioning for assembly—tact 4      | SS226        |                                                                                           | Forklift 2 h     |
| 228 | 2.2.3.4.1.13. Mobile crane stop (during assembly)—tact 4      | FS227        | Material appears at the place of the future element                                       | 4.5 h            |
| 229 | 2.2.3.4.1.14. Forklift repositioning (during assembly)—tact 4 | SS228        | Material on the forklift<br>Material disappears from the stock                            | 4.5 h            |
| 230 | 2.3. Warehouse                                                |              |                                                                                           | 13 d             |
| 231 | 2.3.1. Ground floor                                           |              |                                                                                           | 13 d             |
| 232 | 2.3.1.1. Steel columns                                        |              |                                                                                           | 2 d              |
| 233 | 2.3.1.1.1. Assembly                                           |              |                                                                                           | 2 d              |
| 234 | 2.3.1.1.1.1. Mobile crane arrival and positioning             | FS213; FS131 |                                                                                           | Mobile crane 2 h |

|     |                                                                |       |                                                                                           |              |      |
|-----|----------------------------------------------------------------|-------|-------------------------------------------------------------------------------------------|--------------|------|
| 235 | 2.3.1.1.1.2. Forklift repositioning for assembly               | SS234 |                                                                                           | Forklift     | 2 h  |
| 236 | 2.3.1.1.1.3. Mobile crane stop (during assembly)               | FS235 | Material appears at the place of the future element                                       | Mobile crane | 14 h |
| 237 | 2.3.1.1.1.4. Forklift repositioning (during assembly)          | SS236 | Material on the forklift<br>Material disappears from the stock                            | Forklift     | 14 h |
| 238 | 2.3.1.2. Steel beams                                           |       |                                                                                           |              | 2 d  |
| 239 | 2.3.1.2.1. Assembly                                            |       |                                                                                           |              | 2 d  |
| 240 | 2.3.1.2.1.1. Mobile crane stop (during assembly)               | FS237 | Material appears at the place of the future element                                       | Mobile crane | 16 h |
| 241 | 2.3.1.2.1.2. Forklift repositioning (during assembly)          | SS240 | Material on the forklift<br>Material disappears from the stock                            | Forklift     | 16 h |
| 242 | 2.3.1.3. L-profile                                             |       |                                                                                           |              | 1 d  |
| 243 | 2.3.1.3.1. Assembly                                            |       |                                                                                           |              | 1 d  |
| 244 | 2.3.1.3.1.1. Element assembly                                  | SS240 | Material appears at the place of the future element<br>Material disappears from the stock |              | 8 h  |
| 245 | 2.3.1.4. Facade panels                                         |       |                                                                                           |              | 2 d  |
| 246 | 2.3.1.4.1. Assembly                                            |       |                                                                                           |              | 2 d  |
| 247 | 2.3.1.4.1.1. Mobile crane positioning – tact 1                 | FS270 |                                                                                           | Mobile crane | 2 h  |
| 248 | 2.3.1.4.1.2. Forklift repositioning for assembly – tact 1      | SS247 |                                                                                           | Forklift     | 2 h  |
| 249 | 2.3.1.4.1.3. Mobile crane stop (during assembly) – tact 1      | FS248 | Material appears at the place of the future element                                       |              | 6 h  |
| 250 | 2.3.1.4.1.4. Forklift repositioning (during assembly) – tact 1 | SS249 | Material on the forklift<br>Material disappears from the stock                            |              | 6 h  |
| 251 | 2.3.1.4.1.5. Mobile crane positioning – tact 2                 | FS250 |                                                                                           | Mobile crane | 2 h  |
| 252 | 2.3.1.4.1.6. Forklift repositioning for assembly – tact 2      | SS251 |                                                                                           | Forklift     | 2 h  |
| 253 | 2.3.1.4.1.7. Mobile crane stop (during assembly) – tact 2      | FS252 | Material appears at the place of the future element                                       |              | 6 h  |
| 254 | 2.3.1.4.1.8. Forklift repositioning (during assembly) – tact 2 | SS253 | Material on the forklift<br>Material disappears from the stock                            |              | 6 h  |
| 255 | 2.3.2. Roof                                                    |       |                                                                                           |              | 7 d  |
| 256 | 2.3.2.1. Roof frame rafter                                     |       |                                                                                           |              | 1 d  |
| 257 | 2.3.2.1.1. Assembly                                            |       |                                                                                           |              | 1 d  |
| 258 | 2.3.2.1.1.1. Mobile crane stop (during assembly)               | FS241 | Material appears at the place of the future element                                       | Mobile crane | 8 h  |

|     |                                                       |       |                                                                                           |              |      |
|-----|-------------------------------------------------------|-------|-------------------------------------------------------------------------------------------|--------------|------|
| 259 | 2.3.2.1.1.2. Forklift repositioning (during assembly) | SS258 | Material on the forklift<br>Material disappears from the stock                            | Forklift     | 8 h  |
| 260 | 2.3.2.2. Roof purlin                                  |       |                                                                                           |              | 2 d  |
| 261 | 2.3.2.2.1. Assembly                                   |       |                                                                                           |              | 2 d  |
| 262 | 2.3.2.2.1.1. Mobile crane stop (during assembly)      | FS259 | Material appears at the place of the future element                                       | Mobile crane | 16 h |
| 263 | 2.3.2.2.1.2. Forklift repositioning (during assembly) | SS262 | Material on the forklift<br>Material disappears from the stock                            | Forklift     | 16 h |
| 264 | 2.3.2.3. Roof bracing                                 |       |                                                                                           |              | 2 d  |
| 265 | 2.3.2.3.1. Assembly                                   |       |                                                                                           |              | 2 d  |
| 266 | 2.3.2.3.1.1. Element assembly                         | FS263 | Material appears at the place of the future element<br>Material disappears from the stock |              | 16 h |
| 267 | 2.3.2.4. Roof panels                                  |       |                                                                                           |              | 2 d  |
| 268 | 2.3.2.4.1. Assembly                                   |       |                                                                                           |              | 2 d  |
| 269 | 2.3.2.4.1.1. Mobile crane stop (during assembly)      | FS266 | Material appears at the place of the future element                                       | Mobile crane | 16 h |
| 270 | 2.3.2.4.1.2. Forklift repositioning (during assembly) | SS269 | Material on the forklift<br>Material disappears from the stock                            | Forklift     | 16 h |
| 271 | <b>3. Site Demobilization Works</b>                   |       |                                                                                           |              | 1 d  |
| 272 | 3.1. Material and equipment removal                   |       |                                                                                           |              | 1 d  |
| 273 | 3.1.1. Auto crane departure                           | FS229 |                                                                                           |              | 2 d  |
| 274 | 3.1.2. Formwork removal                               |       |                                                                                           |              | 1 d  |
| 275 | 3.1.2.1. Truck arrival                                | FS229 | Material in the stock                                                                     | Truck        | 2 h  |
| 276 | 3.1.2.2. Forklift positioning for loading             | SS275 |                                                                                           | Forklift     | 2 h  |
| 277 | 3.1.2.3. Truck stop (during loading)                  | FS276 | Material disappears from the stock                                                        | Truck        | 4 h  |
| 278 | 3.1.2.4. Forklift repositioning (during loading)      | SS277 | Material on the forklift<br>Material appears on the truck                                 | Forklift     | 4 h  |
| 279 | 3.1.2.5. Truck departure                              | FS278 | Material on the truck                                                                     | Truck        | 2 h  |
| 280 | 3.1.2.6. Forklift repositioning on the final location | SS279 |                                                                                           | Forklift     | 2 h  |
